# Supplementary material for: Single-cell transcriptomics highlights immunological dysregulations of monocytes in the pathobiology of COPD
Source: PubMed Central journal article supplement (PMC9764587; doi:10.1186/s12931-022-02293-2), 2022-12-20
Supplement: 12931_2022_2293_MOESM6_ESM.pdf [file 12931_2022_2293_MOESM6_ESM.pdf]

# Supplementary Figures

**A**

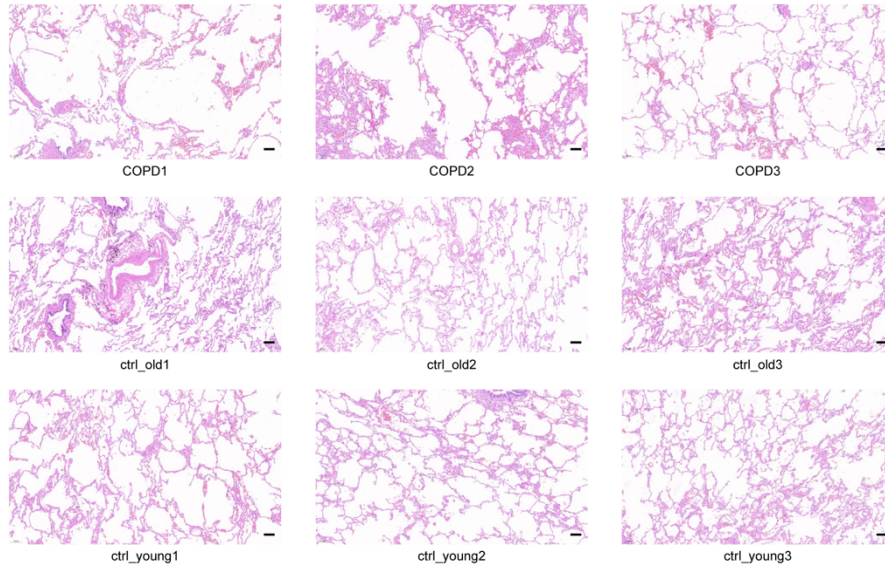

**B**

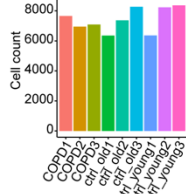

**C**

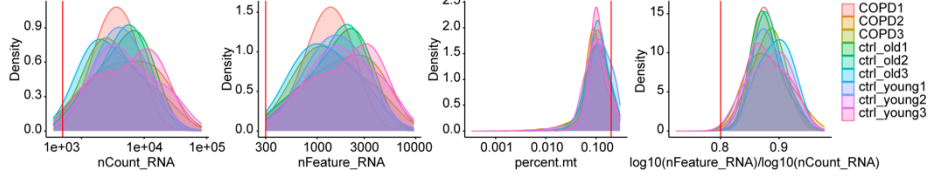

**D**

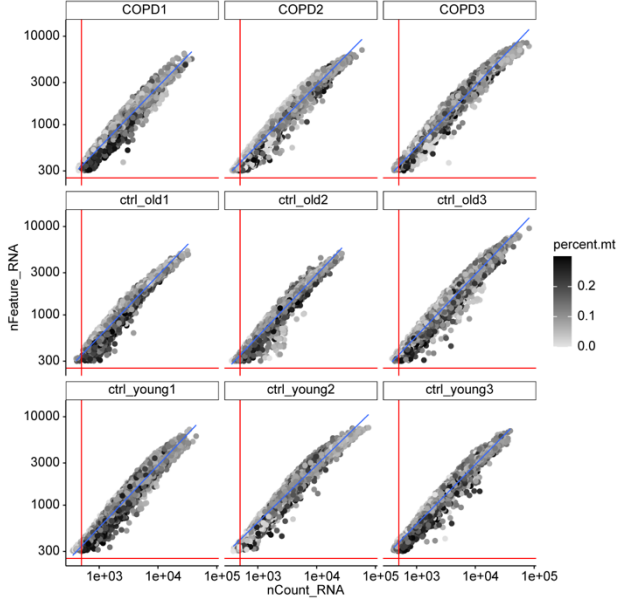

**Figure S1.**

(A) Hematoxylin-eosin (H&E) staining of lung tissues from all the subjects. scale bar = 100  $\mu\text{m}$ .

(B) Bar plot showing the number of cell count per sample.

(C) From left to right are:

Density plot showing the number of RNAs per cell. Red line: 500.

Density plot showing the number of genes detected per cell. Red line: 300.

Density plot showing the percent of mitochondrial reads detected per cell. Red line: 0.2.

Density plot showing the ratio of  $\log_{10}$ (the number of genes) versus  $\log_{10}$ (the number of RNAs per cell).

(D) Scatter plot showing the number of genes versus the number of UMIs and was colored by the percent of mitochondrial reads. The color of the dot indicates the high (black) or the low (white) percent of mitochondrial reads. X intercept red line: 500; Y intercept red line 250.

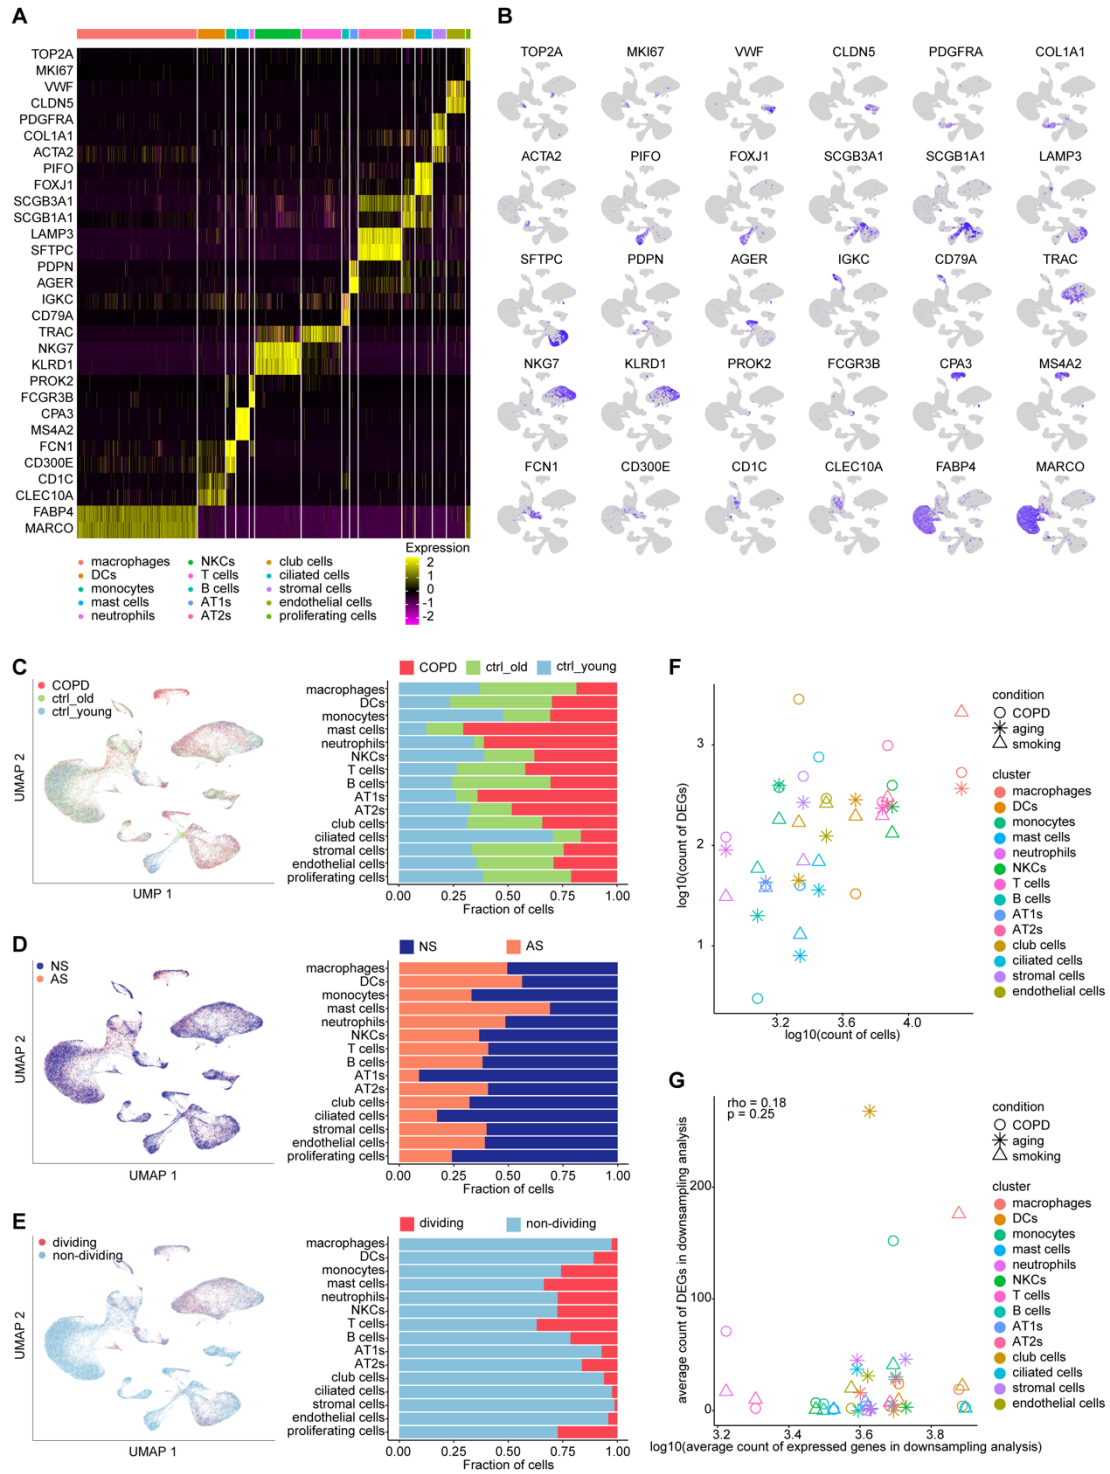

**Figure S2.**

(A) Heatmap showing the expression of marker genes in each cell type used for cluster annotation in Figure 2A.

(B) Feature expression of the marker genes on UMAP plot used for cluster annotation in Figure 2A.

(C) UMAP plot representation of 66,610 cells from lung tissue samples of 3 male COPD patients, 3 male age-matched controls, and 3 male young normal individual; each dot represents a single cell (left-panel). The fractions of each cell type under group are shown in the box plot (right-panel).

(D) UMAP plot representation of 66,610 cells from lung tissue samples of 4 active smokers (AS) and 5 never-smokers (NS); each dot represents a single cell (left-panel). The fractions of each cell type under smoking status are shown in the box plot (right-panel).

(E) UMAP plot representation of 66,610 cells including 9,508 dividing cell states and 57,102 non-dividing cell states; each dot represents a single cell (left-panel). The fractions of each cell type under cell dividing state are shown in the box plot (right-panel).

**(F)** Scatter plot showing the numbers of cell-type specific DEGs under different conditions (COPD, aging, and smoking) against the sample size (cell count) of the same cell type.

**(G)** Scatter plot showing the numbers of cell-type specific DEGs in downsampling analysis under different conditions (COPD, aging, and smoking) against the count of expressed genes of the same cell type in downsampling analysis. The count of cell-type specific DEGs is not dependent on the count of expressed genes of the same cell type. P: spearman's rank correlation p-value between the average numbers of DEGs and the average number of genes expressed in a given cell type in downsampling analysis. two-sided paired t-tests. rho: spearman's rank correlation coefficient.

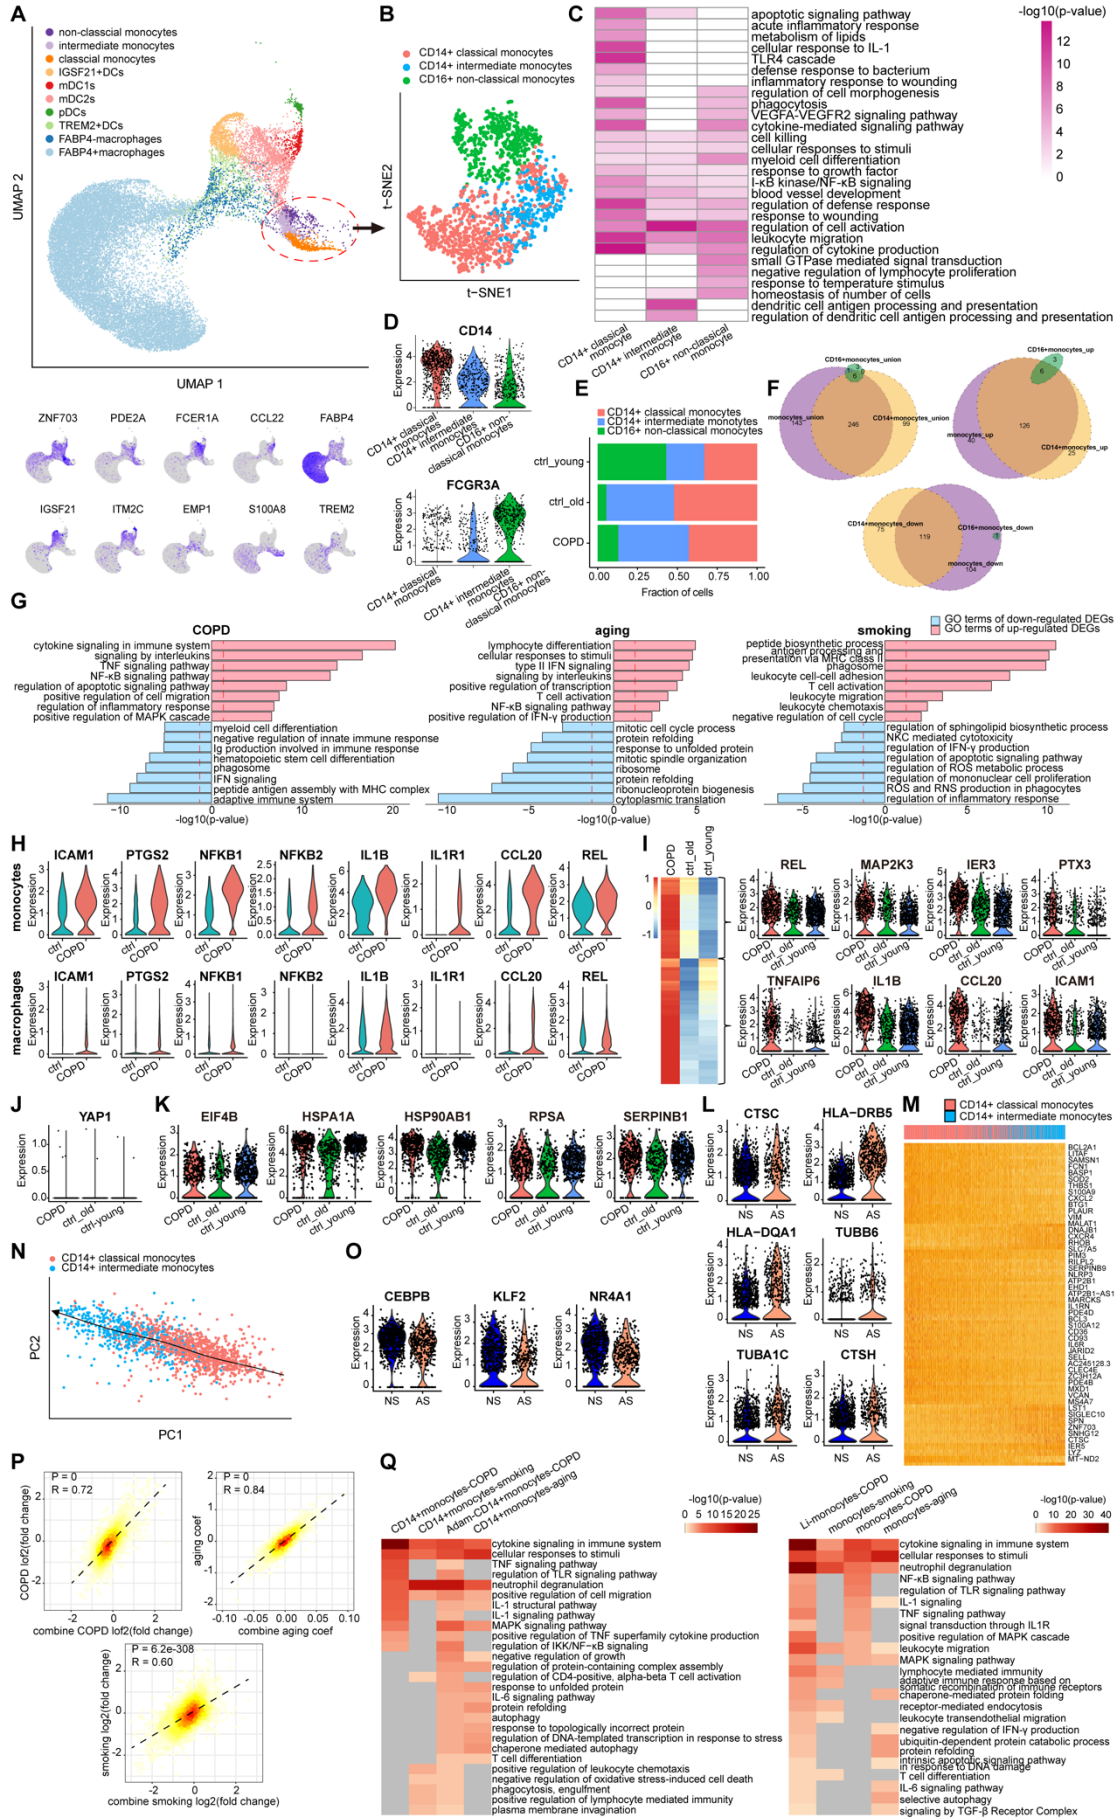

**Figure S3.**

(A) UMAP plot showing all the sub-clusters of monocytes, macrophages, and DCs, with each sub-cluster color-coded for annotated subtype, in which the part circled by the red dotted line are monocytes (up). Feature expression of the marker genes on UMAP plot used for sub-cluster annotation (bottom).

(B) t-SNE plot of 3 sub-clusters in monocytes, including CD14<sup>+</sup> classical monocytes, CD14<sup>+</sup> intermediate monocytes, and CD16<sup>+</sup> non-classical monocytes. Cells are colored by sub-cluster type.

(C) Heatmap displaying the functional annotation of the 3 sub-clusters-specific expressed genes of monocytes in (b), highlighting the functional characteristic of each sub-cluster, such as the involvement of CD14<sup>+</sup> classical monocytes in inflammation, immune response, as well as phagocytosis, and the ability of antigen presentation and T cell activation of CD14<sup>+</sup> intermediate monocytes. The color of heatmap indicates high (dark pink) or low (white)  $-\log_{10}(\text{p-value})$ .

(D) Violin plots showing the expression of representative CD14<sup>+</sup> classical monocytes marker gene (*CD14*) and CD16<sup>+</sup> non-classical monocytes marker gene (*FCGR3A/CD16*) in 3 sub-clusters of monocytes.

(E) Bar plot showing the relative proportion of CD14<sup>+</sup> classical monocytes, CD14<sup>+</sup> intermediate monocytes, and CD16<sup>+</sup> non-classical monocytes across young control (ctrl\_young), old control (ctrl\_old), and COPD patient (COPD) groups. Only CD16<sup>+</sup> non-classical monocytes are primarily derived from young control group.

(F) Venn plots of total (union, up left), up-regulated (up, up right), and down-regulated (down, bottom) COPD-associated DEGs in total monocytes, CD14<sup>+</sup> monocytes, and CD16<sup>+</sup> monocytes, clearly showing the overrepresentation of all the 3 kinds of COPD-associated DEGs in CD14<sup>+</sup> monocytes, compared with CD16<sup>+</sup> monocytes.

(G) Bar plots showing the top GO functional enrichment of COPD- (left), aging- (middle), and smoking- (right) DEGs of CD14<sup>+</sup> monocytes which are arranged according to p-value.

(H) Violin plots demonstrating the expression distributions of *ICAMI*, *PTGS2*, *NFKB1*, *NFKB2*, *IL1B*, *IL1R1*, *CCL20*, and *REL* in monocytes (up) and macrophages (bottom) among control and COPD groups, revealing the distinction in activation of these pro-inflammatory genes between monocytes and macrophages under COPD conditions.



(I) Heatmap displaying the average expression of the up-regulated COPD-associated DEGs in monocytes among three groups (COPD, ctrl\_young, and ctrl\_young) (left), from which upstream genes (such as *REL*, *MAP2K3*, *IER3*, and *PTX3*) in NF- $\kappa$ B and TNF pathways are also increased in monocytes from old controls (up right), while many downstream effectors (such as *TNFAIP6*, *IL1B*, *CCL20*, and *ICAM1*) are only marginally increased or even decreased in monocytes from old controls, compared with young controls (bottom right). The color of heatmap indicates high (red) or low (blue) expression value.

(J) Violin plot showing the expression of *YAP1* in monocytes among three groups (COPD, ctrl\_young, and ctrl\_young), suggesting that *YAP1* is hardly expressed in monocytes.

(K) Violin plots displaying the specific down-regulation of several aging-associated DEGs of monocytes including translation initiation factors (*EIF4B*), heat shock proteins (*HSP90AB1*, *HSPA1A*), ribosomal proteins (*RPSA*), and protease inhibitors vital to inflammation as well as cellular secretion (*SERPINB1*) in monocytes from old controls, compared with COPD patients and young controls, indicating the post-transcriptional dysfunction of aged monocytes accounting for inflammaging.

(L) Violin plots showing the expression distributions of some representative genes enriched in MHC class II antigen presentation (including *CTSC*, *HLA-DRB5*, *HLA-DQAI*, *TUBB6*, *TUBA1C*, and *CTSH*) in monocytes among active smoker (AS) and never-smoker (NS) groups, the increased expression of which in active smoker (AS) groups strongly indicates the activation of antigen processing and presentation via MHC II in the monocytes from active smokers (AS), compared with never-smokers (NS).

(M) Heatmaps displaying the scaled expression profile for the top 100 genes (largest *waldStat* from *slingshot associationTest*) contributing to CD14<sup>+</sup> classical monocytes-to-CD14<sup>+</sup> intermediate monocytes differentiation with cells (columns) ordered according to their pseudotimes.

(N) A trajectory reflecting CD14<sup>+</sup> classical monocytes-to-CD14<sup>+</sup> intermediate monocytes differentiation by *slingshot*.

(O) Violin plots displaying the expression of *CEBPB*, *KLF2*, and *NR4A1* in monocytes among active smoker (AS) and never-smoker (NS) groups, showing that these genes vital to monocyte differentiation are all declined by smoking.

(P) Scatter plots showing the highly positive correlation between the  $\log_2$ (fold change) of the COPD-, smoking-, as well as aging-associated DEGs of monocytes from our dataset and those combined with the correspondent data from Adams and his colleagues (32832599), respectively. P: Pearson correlation p-value of two-sided paired t-tests. R: Pearson correlation coefficient of two-sided paired t-tests.

(Q) Terms with the best p-value within the COPD-, aging-, and smoking-associated DEGs of monocytes in our dataset and those within the COPD-associated DEGs of monocytes in Li's (33823868) are selected to eliminate some biological processes too broad to reflect the specific pathological role and displayed in a heatmap (left). Terms with the best p-value within the COPD-, aging-, and smoking-associated DEGs of CD14+ monocytes in our dataset and those within the COPD-associated DEGs of CD14+ monocytes in Adams' (32832599) are also selected and displayed in a heatmap (right). Both heatmaps demonstrate similarities of the molecular changes in monocytes from COPD lung tissues between our dataset and others', while also highlighted the distinct molecular changes in monocytes from aged and smoking lung tissues detected in our dataset which are to some degree overlapped with those of monocytes from COPD lung tissues in others' datasets due to their mixture with aging and smoking.

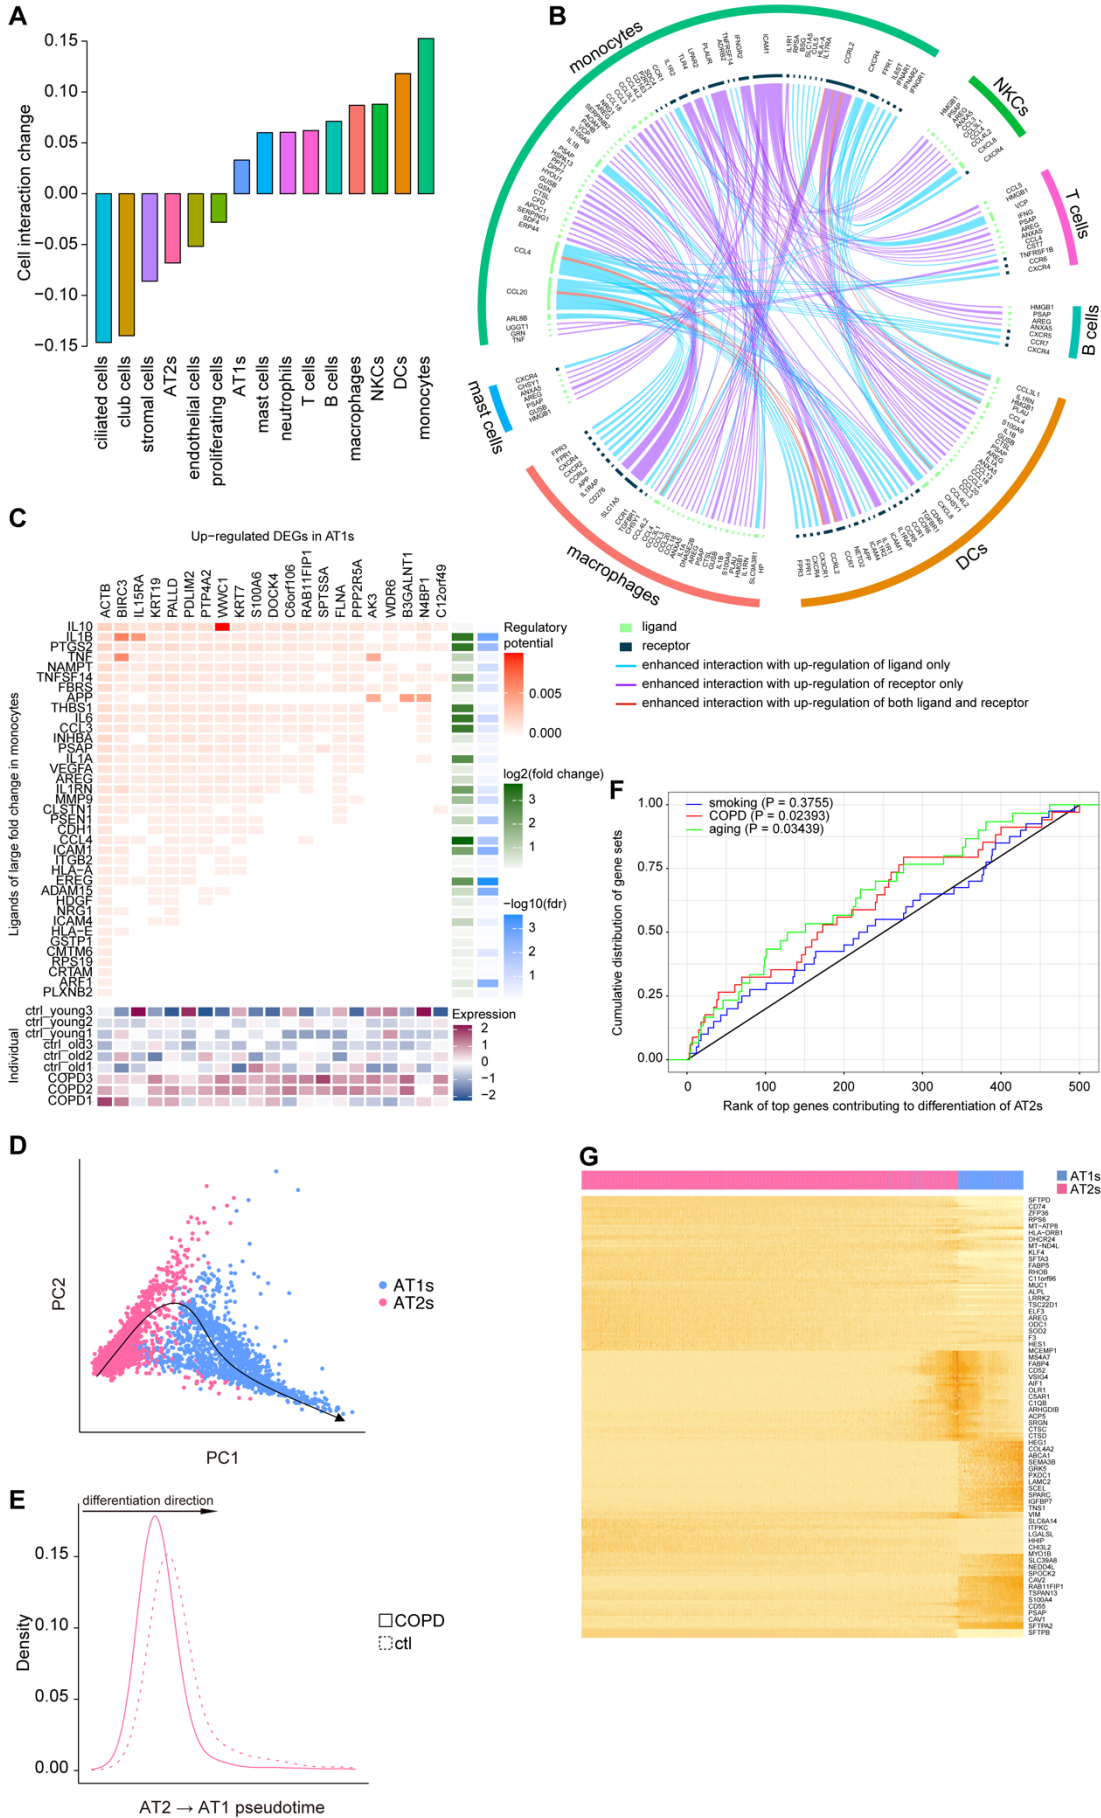

**Figure S4.**

(A) Bar plot showing the average relative changes of CCIs of each cell type with all the cell types predicted by CellPhoneDB from control lungs to COPD lungs. For example, in monocytes, the relative change (the difference between the COPD significant ligand-receptor (LR) interaction pair number and the control significant LR interaction pair number and then divided by the control significant LR interaction pair number) of CCI between monocytes and each cell types under the two conditions of COPD and control are calculated first, and then the mean of the relative change across all cell types are calculated as monocytes average relative changes of CCIs.

(B) Circos plot showing the ligand-receptor pairs responsible for the enhanced CCIs among monocytes, NKCs, T cells, B cells, DCs, macrophages, and mast cells predicted by CellPhoneDB, for which monocytes are either sender cells or receiver cells. Each light green inside arc represents a ligand and each dark green one represents a receptor. Blue lines link ligands and receptors showing enhanced interactions with up-regulation of ligands only. Purple lines link ligands and receptors showing enhanced interactions with up-regulation of receptors only. Red lines link ligands and receptors showing enhanced interactions with up-regulation of both ligands and receptors.

(C) The top heatmap showing the potential of ligands of large fold change ( $\log_2(\text{fold change}) > 0.14$  or  $\log_2(\text{fold change}) < -0.14$ ) in monocytes (on the y-axis) regulating the up-regulated COPD-associated DEGs in AT1s (on the x-axis) predicted by NicheNet analysis. The fold change and false discovery rate of these ligands are shown in 2 separate heatmaps on the right. The mean gene expressions of the up-regulated COPD-associated DEGs in AT1s across 9 samples are shown in the lower heatmap. The mean gene expression per sample is represented as a z-transformed value (across all samples).

(D) A trajectory reflecting AT2-to-AT1 differentiation by slingshot.

(E) Density plot of cells from control (dotted line) and COPD (full line) lungs in AT1s and AT2s along AT2s to AT1s pseudotime. Cells from COPD lung tissues are more clustered in the early stage of differentiation path, supporting compromised capacity of AT2s differentiating to AT1s during COPD development.

(F) Kolmogorov-Smirnov plot showing the enrichment of COPD-, aging-, and smoking-associated DEGs of monocytes among the set of top 500 driver genes (largest waldStat from slingshot associationTest) responsible for AT2-to-AT1 differentiation, highlighting the overrepresentation of both COPD- and aging-associated DEGs among the set of driver genes.

**(G)** Heatmaps displaying the scaled expression profile for the top 100 driver genes (largest waldStat from slingshot associationTest) contributing to AT2-to-AT1 differentiation with cells (columns) ordered according to their pseudotimes.

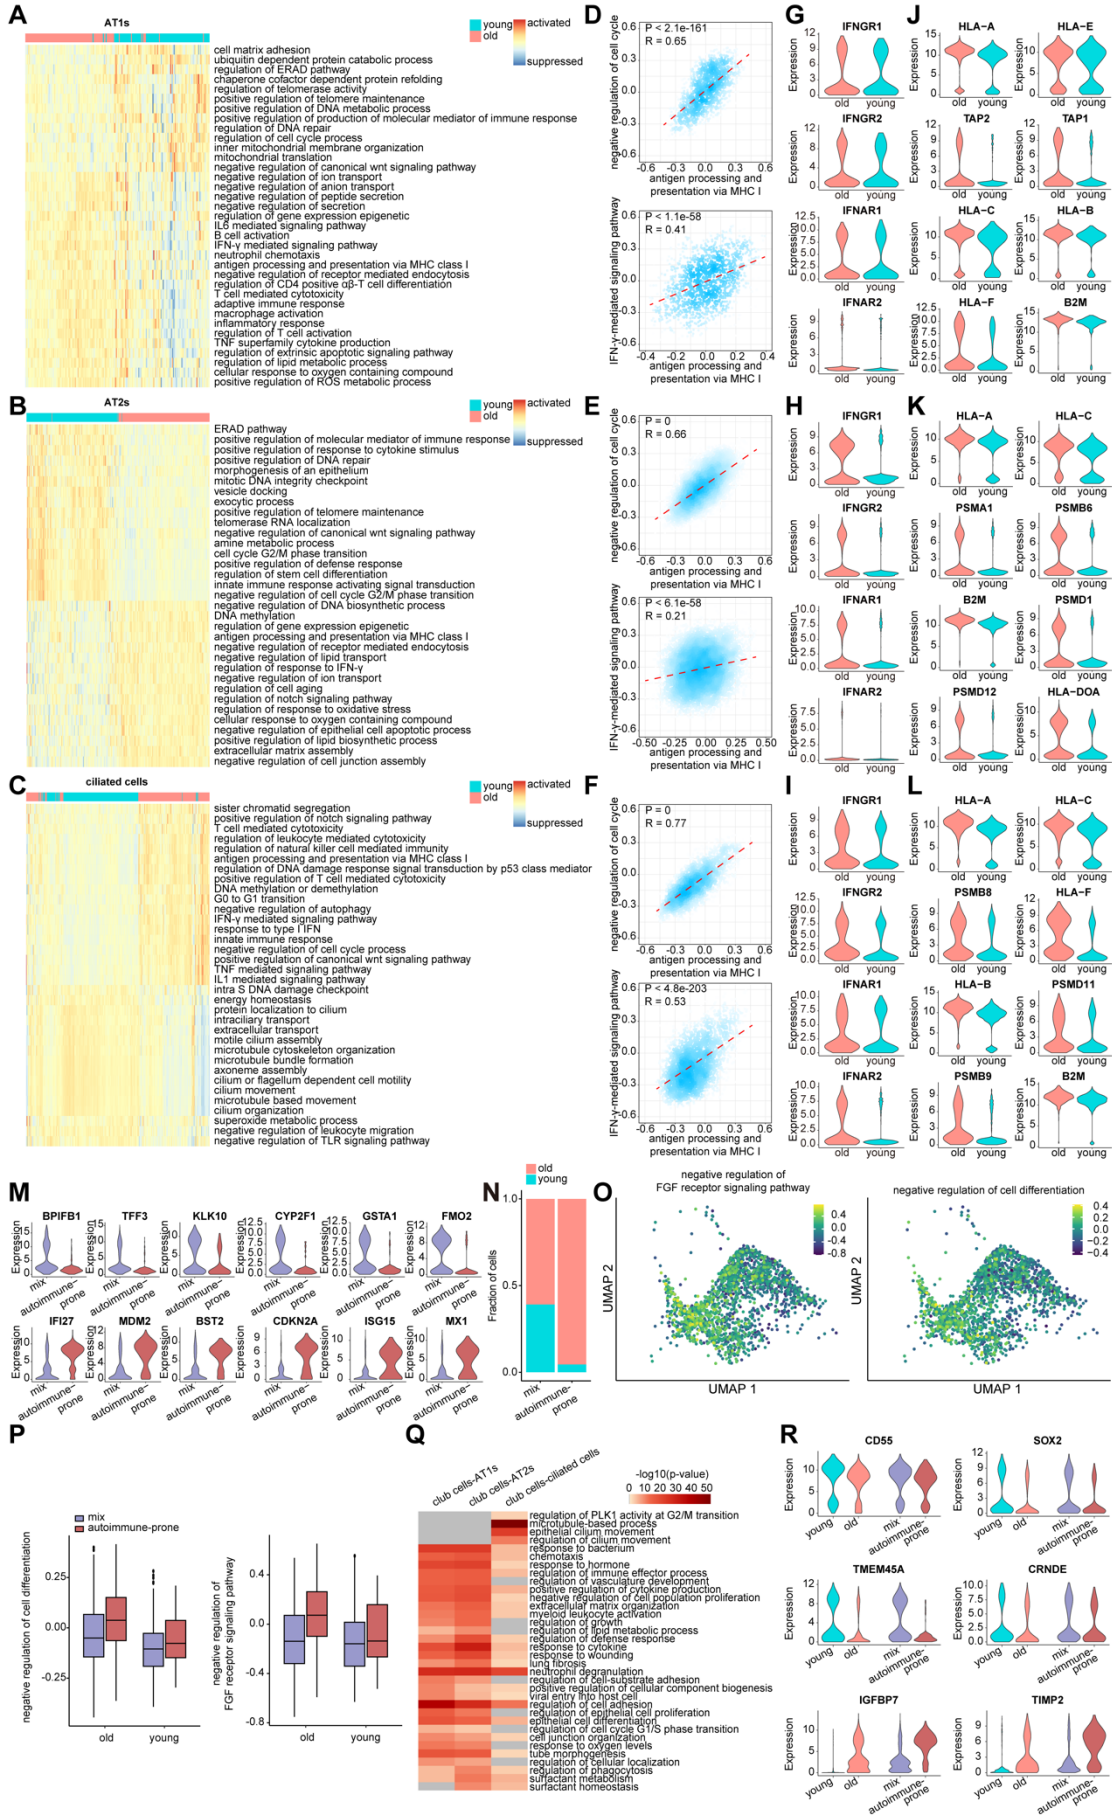



**Figure S5.**

(A-C) Heatmaps showing the GSVA analysis enrichment score of the top altered biological pathways in AT1s (A), AT2s (B), and ciliated cells (C) from lung tissues of young (cyan) and old (pink) individuals. All cells within young or old are randomly clustered into 100 groups, and then averages of expression were calculated within each group, resulting in 100 transcriptomic profiles each for old and young. The colors from red to blue represent alterations of biological pathways states from activated to suppressed.

(D-F) Scatterplots showing the correlations of GSVA analysis enrichment score between pathway of antigen processing and presentation via MHC class I and two other biological pathways (including negative regulation of cell cycle and IFN- $\gamma$ -mediated signalling pathway) in AT1s (D), AT2s (E), and ciliated cells (F) from lung tissues of young (cyan) and old (pink) individuals. P: Pearson correlation p-value of two-sided paired t-tests. R: Pearson correlation coefficient of two-sided paired t-tests.

(G-I) Violin plots for genes encoding IFN receptors including *IFNRG1*, *IFNRG2*, *IFNRA1*, and *IFNRA2* in AT1s (G), AT2s (H), and ciliated cells (I) from lung tissues of young (cyan) and old (pink) individuals, demonstrating the up-regulation of IFN receptors responsible for the generally enhanced IFN reactivity in aged lung epithelial cells.

(J-L) Violin plots for genes involved in pathway of antigen processing and presentation via MHC class I in AT1s (J), AT2s (K), and ciliated cells (L) from lung tissues of young (cyan) and old (pink) individuals, demonstrating the up-regulation of key components of MHC class I antigen presentation pathway (esp. *B2M*) responsible for the generally augmented autoimmunity in aged lung epithelial cells.

(M) Violin plots showing the expression levels of marker genes for the mix sub-cluster of club cells (*BPIFB1*, *TFF3*, *KLK10*, *CYP2F1*, *GSTA1*, and *FMO2*) and those for the autoimmune-prone sub-cluster of club cells (*IFI27*, *MDM2*, *BST2*, *CDKN2A*, *ISG15*, and *MXI*) in both sub-clusters of club cells.

(N) Bar plot showing percentages of club cells from lung tissues of young (cyan) and old (pink) individuals in autoimmune-prone sub-cluster of club cells (autoimmune-prone) and other sub-clusters of club cells (mix). The enrichment of autoimmune-prone sub-cluster in club cells from lung tissues of old individuals highlights the autoimmunity unique to aged club cells.

(O) Feature plots for GSVA analysis enrichment scores of FGF receptor signalling pathway (left) and negative regulation of cell differentiation (right) in all the club cells. One dot represents a club cell. The colors from yellow to dark green represent alterations of biological pathways states from activated to suppressed. Both FGF

receptor signalling and cell differentiation are relatively suppressed in the autoimmune-prone sub-cluster of club cells.

**(P)** Box plots showing the GSVA analysis enrichment score of negative regulation of cell differentiation and negative regulation of FGF receptor signalling pathway in autoimmune-prone and mix sub-clusters among club cells from lung tissues of young and old individuals. Both pathways are significantly activated in the autoimmune-prone sub-cluster among club cells from lung tissues of young individuals, compared to the mix one among the club cells from lung tissues of the same individuals, the degree of which is much greater among the club cells from lung tissues of the old individuals.

**(Q)** Functional annotation of top 100 driver genes in the three differentiation paths of club cells, including club cells to AT1s, club cells to AT2s, and club cells to ciliated cells, which not only includes genes that are generally important to cell differentiation, but also highlights functional genes specific to different cell types. The heatmap is used to visualize these biological processes, of which cells are colored by their enrichment analysis p-values and the gray cells indicate the lack of enrichment for that term in the corresponding gene list.

**(R)** Violin plots for pro-proliferative genes (including *SOX2*, *TMEM45A*, *CRNDE*, and *CD55*) and anti-proliferative ones (including *IGFBP7* and *TIMP2*) expression in club cells from lung tissues of young (cyan) and old (pink) individuals as well as the autoimmune-prone (brown) and mix (purple) sub-clusters of club cells. The pro-proliferative genes are down-regulated in club cells from lung tissues of old individuals, compared with those from young ones. The anti-proliferative genes are just the opposite.

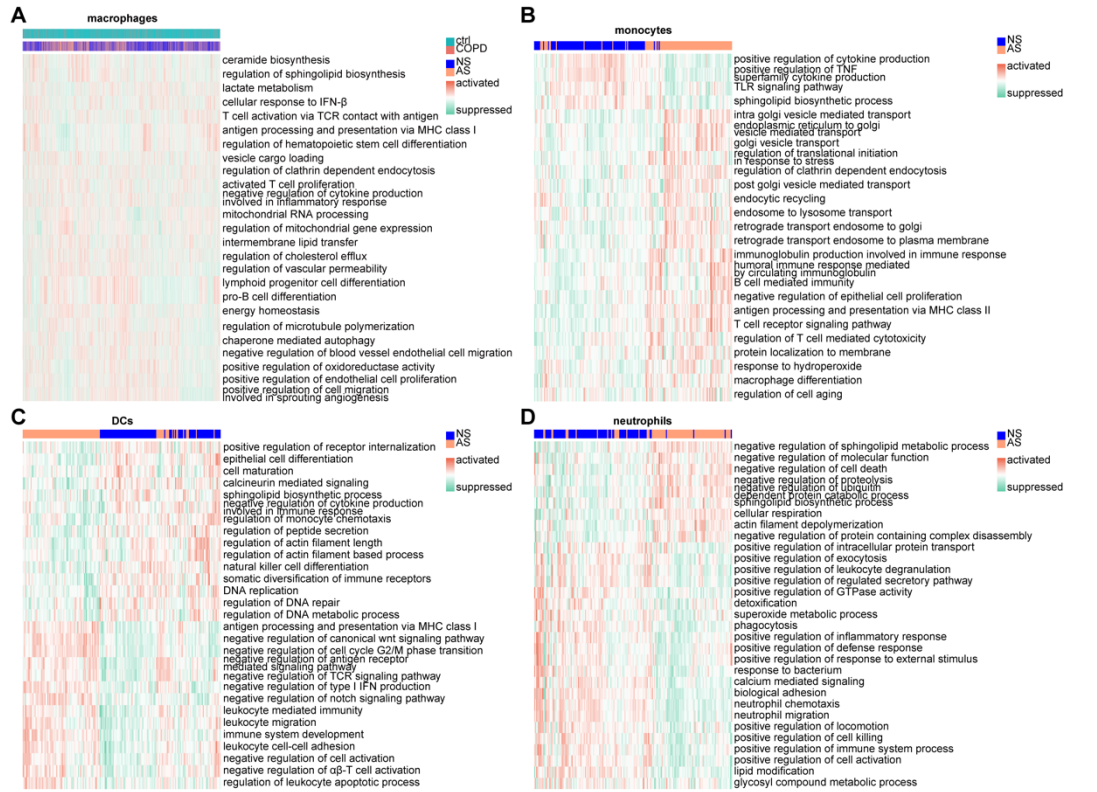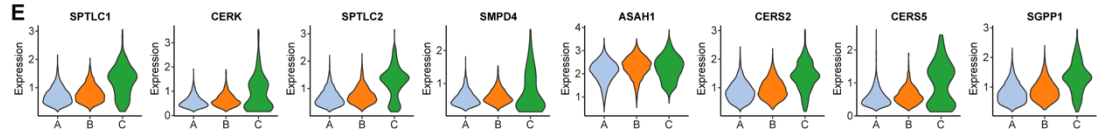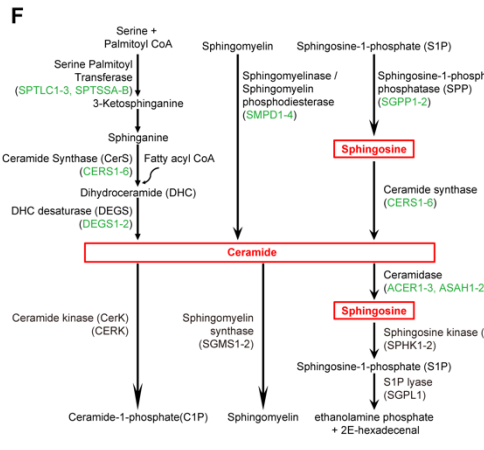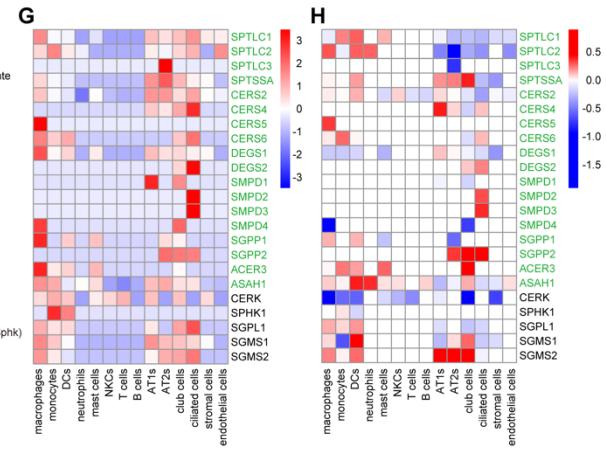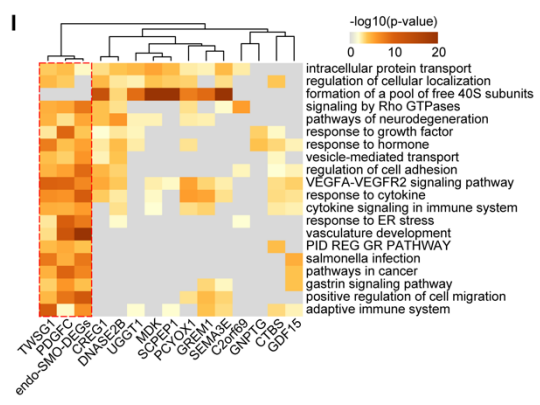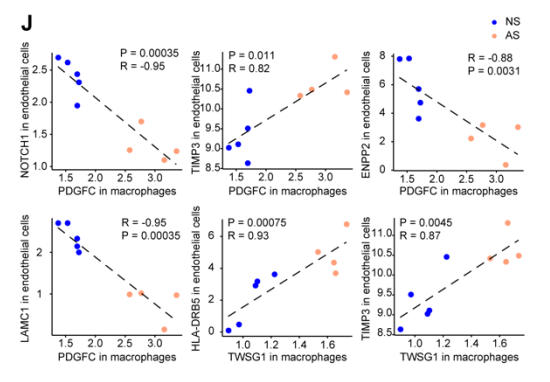

**Figure S6.**

(A-D) Heatmaps showing the GSVA analysis enrichment score of the top altered biological pathways in macrophages (A), monocytes (B), DCs (C), and neutrophils (D) from lung tissues of active smokers (AS, orange) and never-smokers (NS, blue). The colors from red to green represent alterations of biological pathways states from activated to suppressed. The disease conditions of individuals from which macrophages are derived are reflected as different colors of the bar above the heatmap in (A). The discrete distribution of macrophages in individual disease states reflects their high heterogeneity.

(E) Violin plots for the expression of 8 genes encoding enzymes implicated in sphingolipid metabolism in subtypes A, B, and C of macrophages, showing the overexpression of *SPTLC1*, *SPTLC2*, *CERS2*, *CERS5*, *ASAHI*, *SGPPI*, *CERK*, and *SMPD4* in subtype C of macrophages.

(F) Schematic of sphingolipid metabolism. Highlighted in green are genes encoding the enzymes responsible for the biosynthesis of ceramide and sphingosine which are framed by red rectangular boxes.

(G) Heatmap showing the normalized average expression levels of genes encoding enzymes implicated in sphingolipid metabolism across all the cell types. The colors

from red to blue represent the gene expression levels from high to low. White represents no expression. Highlighted in green are genes encoding the enzymes responsible for the biosynthesis of ceramide and sphingosine. Only macrophages and airway epithelial cells (including AT1s, AT2s, club cells, and ciliated cells) demonstrate relatively high expressions of genes encoding the enzymes involved in the sphingolipid metabolic pathways.

**(H)** Heatmap showing the  $\log_2(\text{fold change})$  of expression levels of genes encoding enzymes implicated in sphingolipid metabolism under smoking condition in the active smokers compared to the never-smokers across all the cell types. The colors from red to blue represent the gene expression levels from up-regulated to down-regulated. White represents genes no significant changes of expression or the gene expression value was too low to detect  $\log_2(\text{fold change})$ . Highlighted in green are genes encoding the enzymes responsible for the biosynthesis of ceramide and sphingosine. The up-regulation of several genes encoding enzymes catalyzing synthesis of ceramides (such as *SPTLC2*, *CERS2*, and *CERS5*) and sphingosines (such as *ASAHI* and *ACER3*) together with the down-regulation of genes encoding enzymes catalyzing catabolism of ceramides (such as *CERK*) in macrophages from smoking lungs support the elevated levels of ceramides and sphingosines in macrophages by smoking. In contrast, the expression of genes encoding enzymes involved in sphingolipids metabolism in endothelial cells is neither high in steady state nor significantly

changed under smoking conditions, ruling out the possibility that endothelial cells synthesize and secrete sphingolipids under smoking conditions.

**(I)** Functional annotation of smoking-associated DEGs in endothelial cells (endo-SMO-DEGs) and genes in endothelial cells highly correlated with up-regulated candidate ligands in macrophages analyzed in Fig. 7F (each list was named after the candidate ligand). The heatmap is used to visualize these biological processes, of which cells are colored by their enrichment analysis p-values and the gray cells indicate the lack of enrichment for that term in the corresponding gene list. Genes in endothelial cells correlated with ligand genes *PDGFC* and *TWSG1* expressed in macrophages show the most overlap with smoking-associated DEGs in endothelial cells in terms of functional annotation, which is framed by a red dot rectangular box.

**(J)** Scatter plots showing cell type-specific mean gene expression within each individual correlations between *PDGFC* or *TWSG1* in macrophages and several representative highly correlated genes from endothelial cells across active smokers (AS) and never-smokers (NS).
